# Supplementary figures and images for: Subsets of activated monocytes and markers of inflammation in incipient and progressed multiple sclerosis
Source: PubMed Central journal article supplement — Immunol Cell Biol. 2017 Dec 11;96(2):160–74. doi: 10.1111/imcb.1025 (PMC5836924; doi:10.1111/imcb.1025), 2017-12-11

# Figure S11

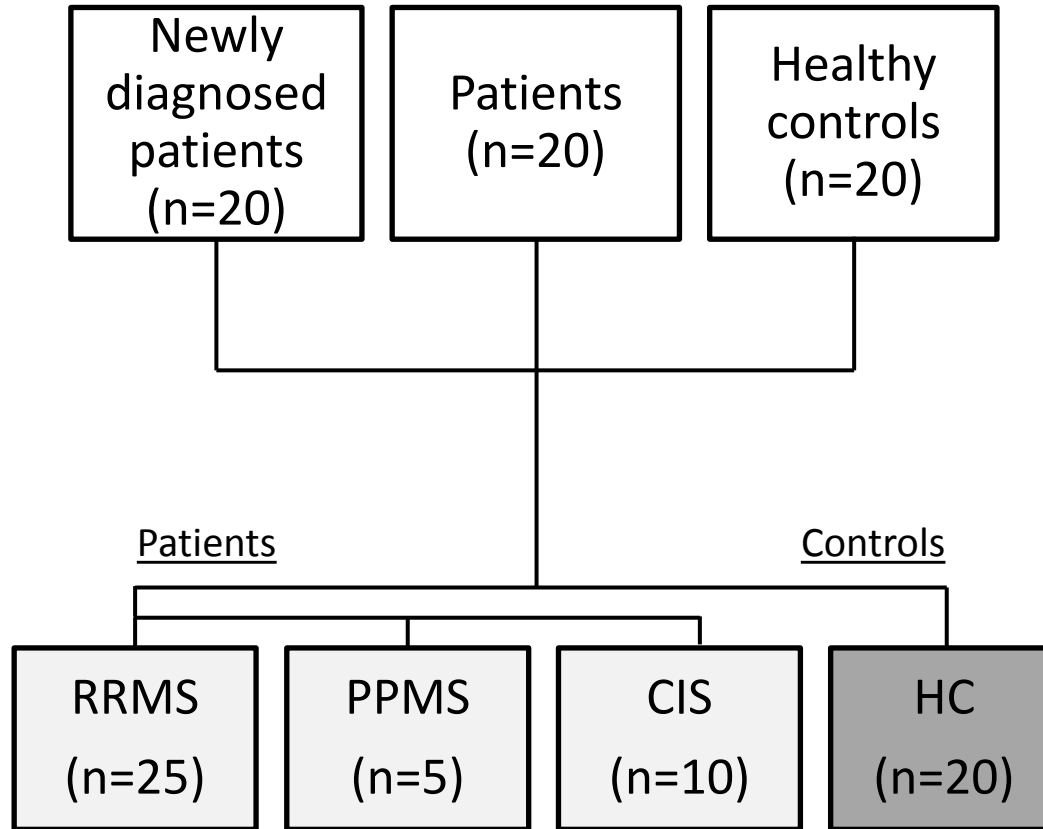

Supplement: IMCB-96-160-s001.pdf [file IMCB-96-160-s001.pdf]

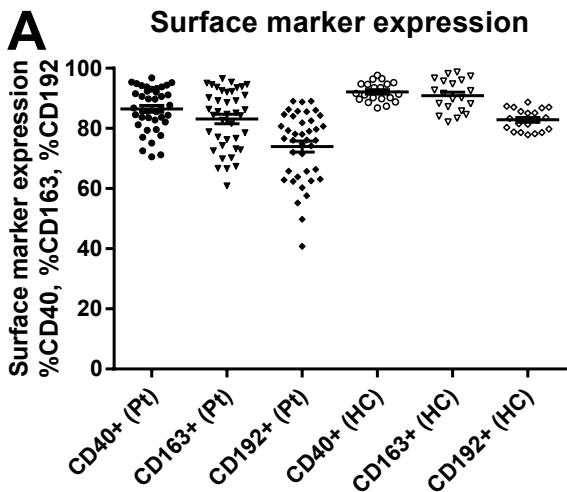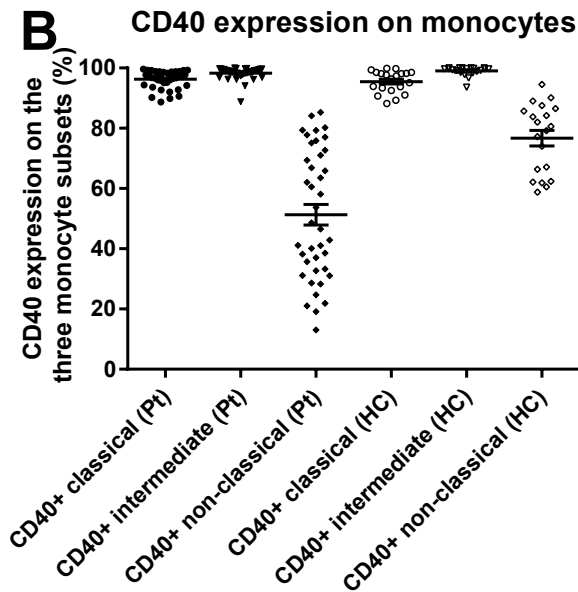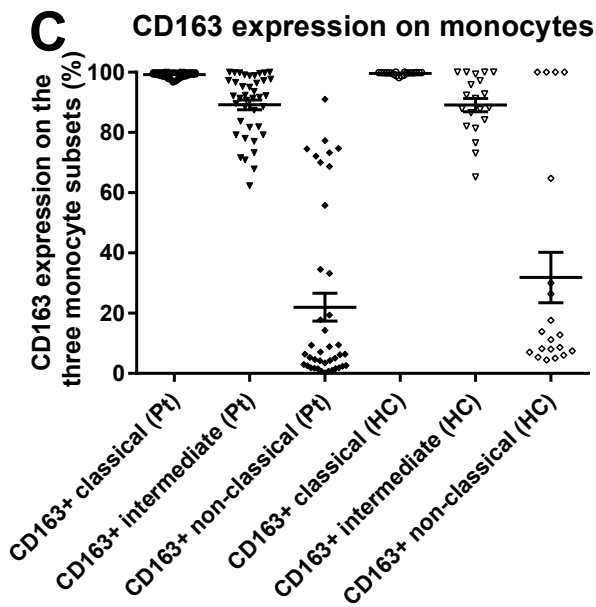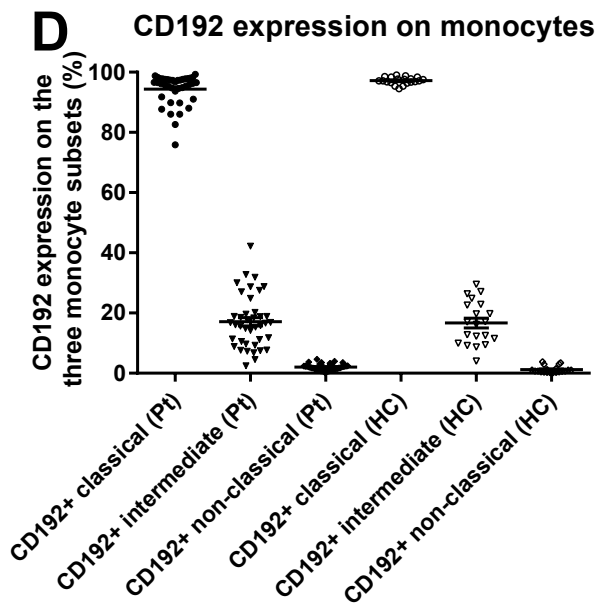

Supplement: IMCB-96-160-s003.pdf [file IMCB-96-160-s003.pdf]

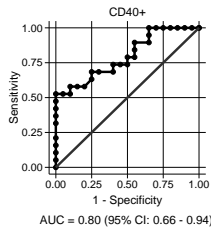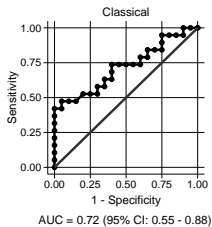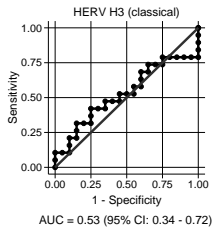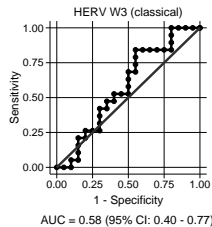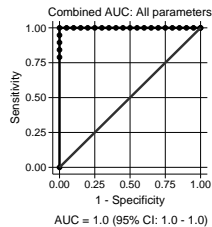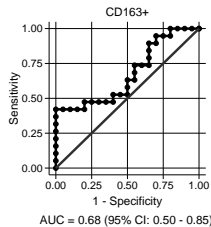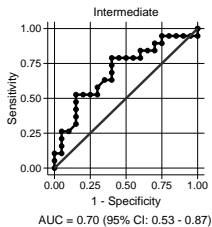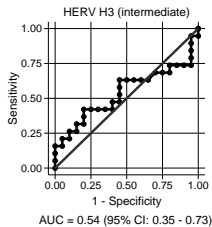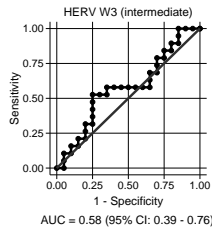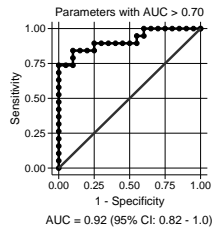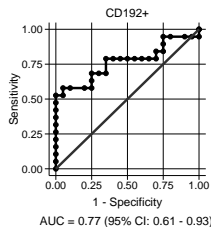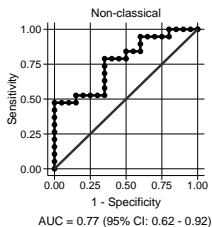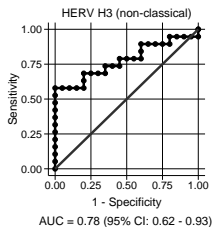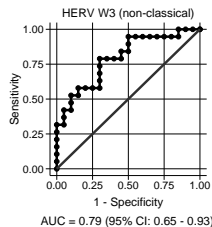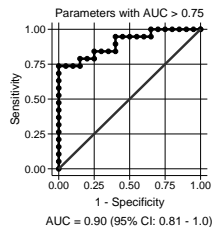

Supplement: IMCB-96-160-s004.pdf [file IMCB-96-160-s004.pdf]

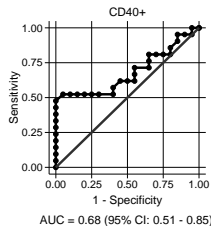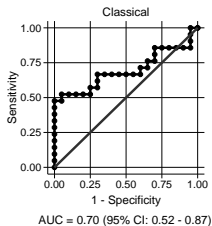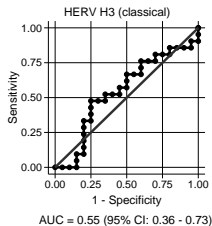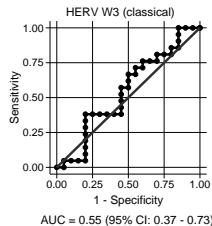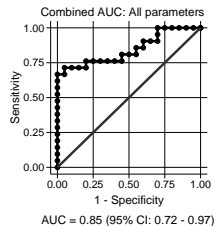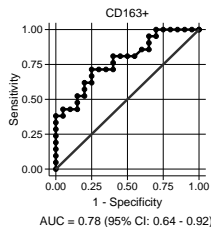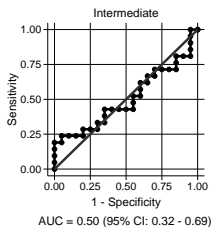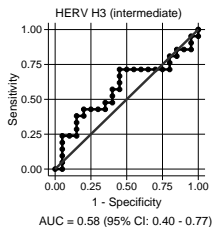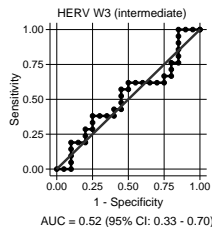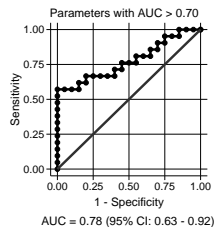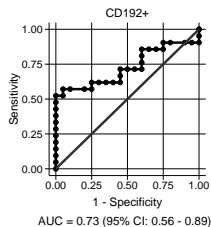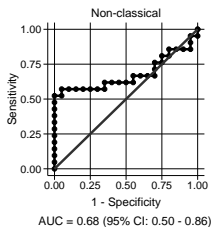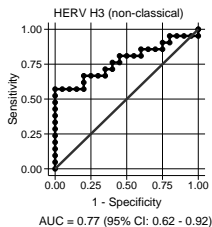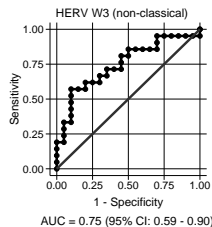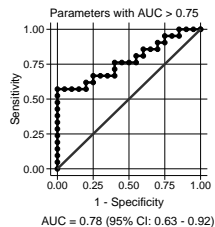

Supplement: IMCB-96-160-s005.pdf [file IMCB-96-160-s005.pdf]

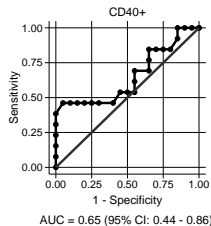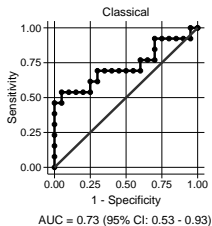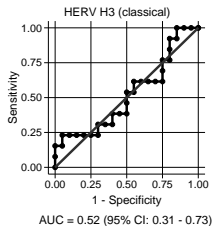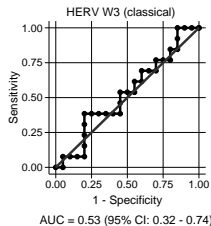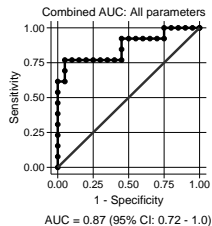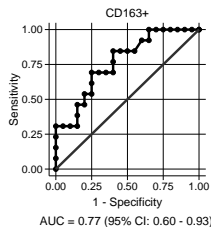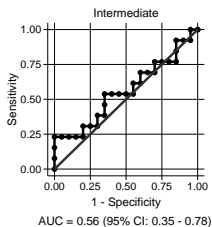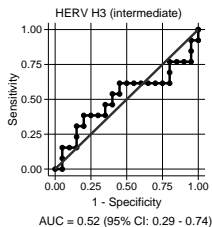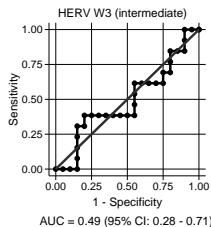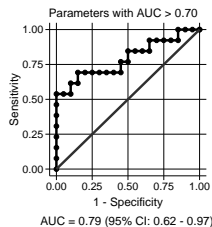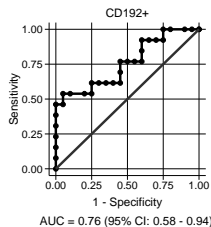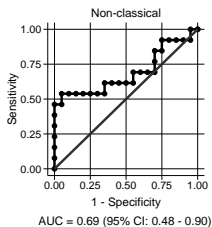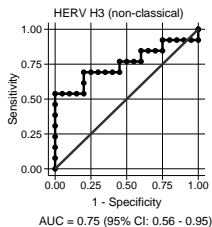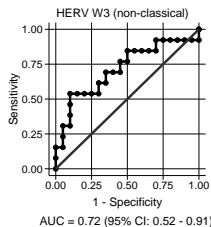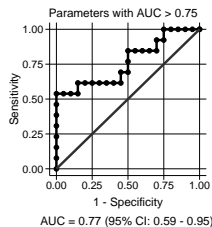

Supplement: IMCB-96-160-s006.pdf [file IMCB-96-160-s006.pdf]

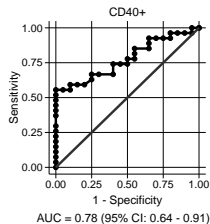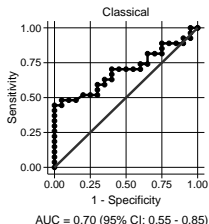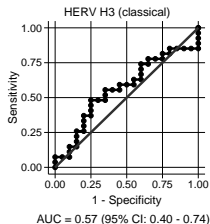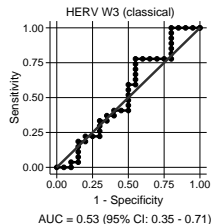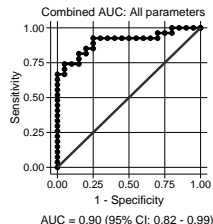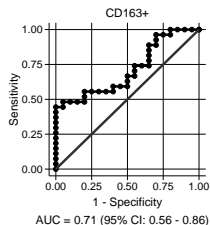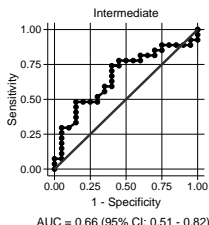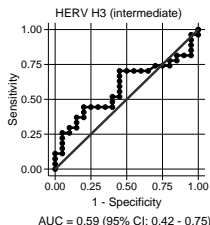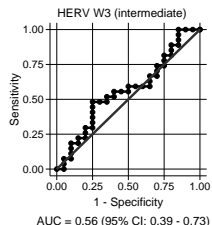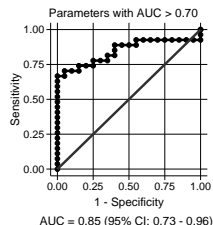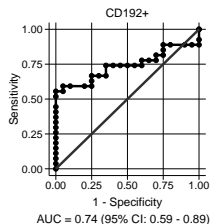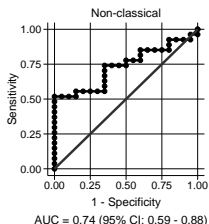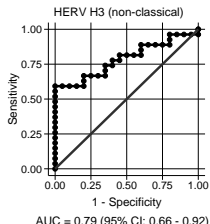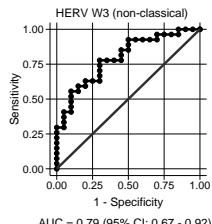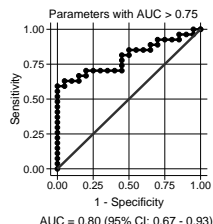

Supplement: IMCB-96-160-s007.pdf [file IMCB-96-160-s007.pdf]
